# Supplementary material
Source: MDPI journal article supplement (https://www.mdpi.com/2073-4433/11/12/1357)
Supplement: s1 [file s1]

Supplementary

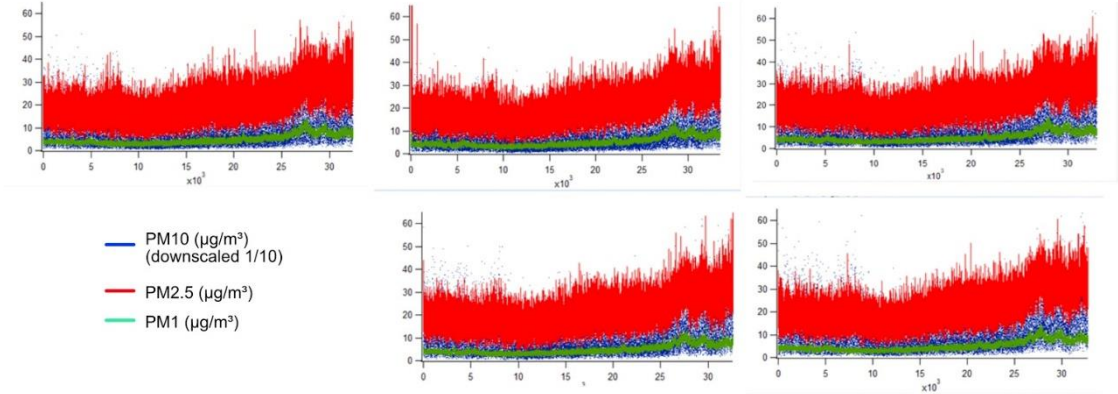

**Figure S1.** Simultaneous co-located overnight measurements from the 5 Alphasense instruments performed in Adama prior to the dry season campaign.

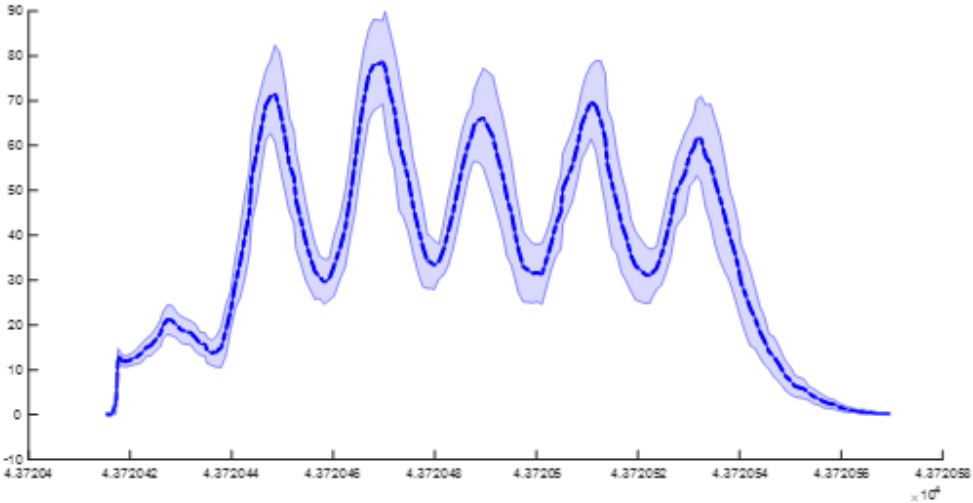

**Figure S2.** The agreement between the 20 Purple Air used during the wet season. Data assessed in a laboratory environment, where diesel exhaust was generated. The dark blue line is the average value of PM2.5 and the light blue area is the standard deviation between the 20 sensors.

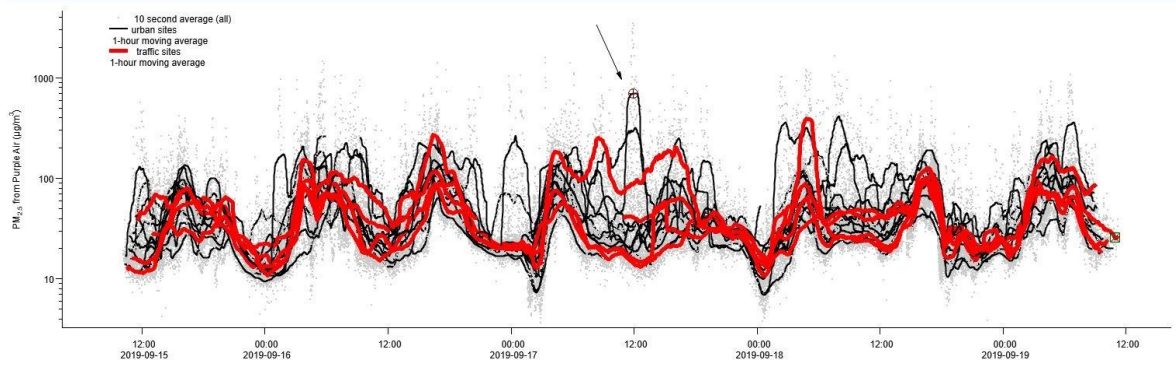

**Figure S3.** Measured PM<sub>2.5</sub> concentrations during the wet season campaign at urban (n = 8) and traffic (n = 6) sites. The arrow points to an event with elevated concentrations during lunchtime at one site, an exception in this dataset.
